# Supplementary material for: Transplantation of olfactory ensheathing cells embedded in the GelMA-F127DA hydrogel promotes the repair of spinal cord injury
Source: Royal Society of Chemistry journal article supplement (doi:10.1039/d5tb01678a), 2025-01-01
Supplement: d5tb01678a1.pdf [file d5tb01678a1.pdf]

## Supporting Information

### Transplantation of Olfactory Ensheathing Cells Embedded in GelMA-F127DA Hydrogel Promotes the Repair of Spinal-Cord Injuries

Yubing Yang<sup>1</sup>, Jiayi Li<sup>1</sup>, Jinghao Zhao<sup>1</sup>, Dong Guo<sup>4</sup>, Jing Li<sup>1</sup>, Jialiang Li<sup>4</sup>, Chengyi Zhang<sup>1</sup>, Chengdong Zhou<sup>1</sup>, Wanzhu Hao<sup>1</sup>, Juan Li<sup>6</sup>, Shengshou Ye<sup>5</sup>, Su'e Chang<sup>1</sup>, Minchao Zhao<sup>1</sup>, Hua Zheng<sup>2\*</sup>, Qiuyu Zhang<sup>2\*</sup>, Xijing He<sup>1,3\*</sup>

1. Department of Orthopedics, The Second Affiliated Hospital of Xi'an Jiaotong University, Xi'an, Shaanxi Province 710004, China
2. School of Chemistry and Chemical Engineering, Northwestern Polytechnical University, Xi'an 710129, P. R. China; Xi'an Key Laboratory of Functional Organic Porous Materials, Northwestern Polytechnical University, Xi'an 710072, P. R. China
3. Department of Orthopedics, Xi'an International Medical Center Hospital, Xi'an, Shaanxi 710100, China
4. Honghui Hospital, Xi'an Jiaotong University, Xi'an, 710014, China
5. Department of Neurology, Qinghai Cardiocerebrovascular Disease Specialised Hospital, Xining City Qinghai Province 810012, China
6. School of Life Sciences, Northwest University, Xi'an, 710069, China

Corresponding author:

Hua Zheng: [zh020106@nwpu.edu.cn](mailto:zh020106@nwpu.edu.cn);

Qiuyu Zhang: [qyzhang@nwpu.edu.cn](mailto:qyzhang@nwpu.edu.cn);

Xijing He: [xijing\\_h@vip.tom.com](mailto:xijing_h@vip.tom.com).

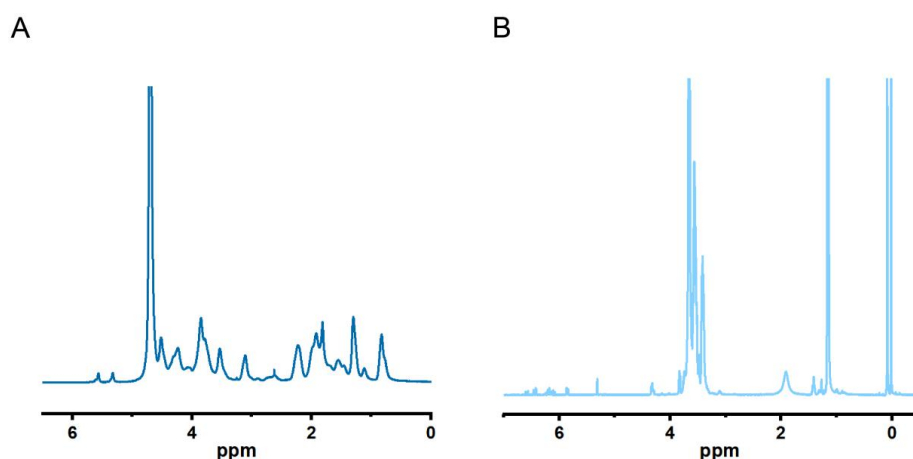

Figure S1. Synthesis of GelMA and F127DA. A. <sup>1</sup>H NMR spectrum of GelMA. B. <sup>1</sup>H NMR spectrum of F127DA.

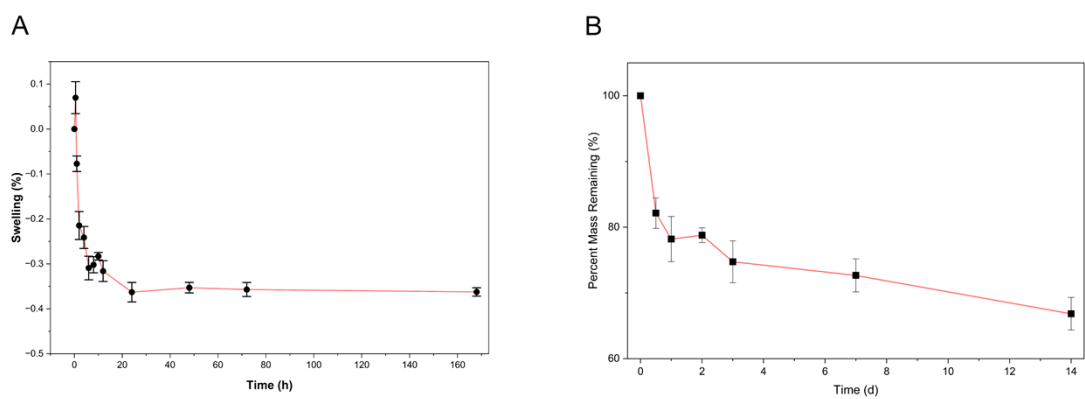

Figure S2. A. Swelling ratios of GEF Hydrogel in PBS. B. Degradation profiles of GEF hydrogel when exposed to collagenase.

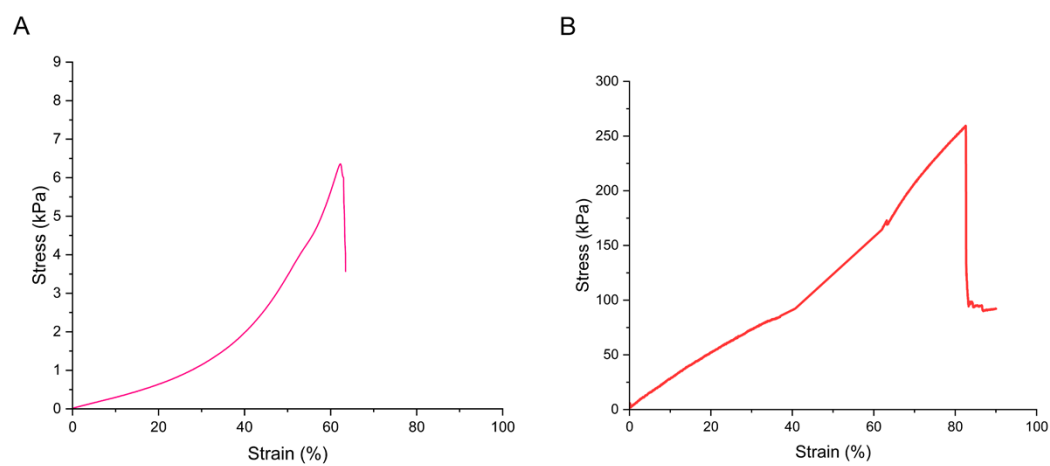

Figure S3. A. Stress-strain curves of GEF hydrogel during compression tests. B. Stress-strain curves of GEF hydrogel during tensile tests.
